1       **Title: Viruses encode tRNA and anti-retron to evade bacterial immunity**

2

3   Aa Haeruman Azam<sup>1</sup>, Kotaro Chihara<sup>1</sup>, Kohei Kondo<sup>1</sup>, Tomohiro Nakamura<sup>1</sup>, Shinjiro Ojima<sup>1</sup>,  
4   Azumi Tamura<sup>1</sup>, Wakana Yamashita<sup>1</sup>, Longzhu Cui<sup>2</sup>, Yoshimasa Takahashi<sup>1</sup>, Koichi Watashi<sup>1</sup>,  
5   Kotaro Kiga<sup>1,2</sup>

6

7   <sup>1</sup>Research Center for Drug and Vaccine Development, National Institute of Infectious Diseases,  
8   Tokyo 162-8640, Japan.

9   <sup>2</sup>Division of Bacteriology, Department of Infection and Immunity, School of Medicine, Jichi  
10   Medical University, Shimotsuke-shi, Tochigi 329-0498, Japan.

11   Corresponding author: k-kiga@niid.go.jp

12

13   **Abstract:** Retrons are bacterial genetic retroelements that encode reverse transcriptase capable  
14   of producing multicopy single-stranded DNA (msDNA) and function as antiphage defense  
15   systems. Phages employ several strategies to counter the host defense systems, but no  
16   mechanisms for evading retons are known. Here, we show that tRNA<sup>Tyr</sup> and Rad (retron anti-  
17   defense) of T5 phage family inhibit the defense activity of retron 78 and a broad range of retons,  
18   respectively. The effector protein of retron 78, ptuAB, specifically degraded tRNA<sup>Tyr</sup> leading  
19   abortive infection, but phage countervailed this defense by supplying tRNA<sup>Tyr</sup>. Rad inhibited  
20   retron function by degrading noncoding RNA, the precursor of msDNA. In summary, we  
21   demonstrated that viruses encode at least two independent strategies for overcoming bacterial  
22   defense systems: anti-defense, such as Rad, and defense canceler, like tRNA.

23   **Keyword:** antiphage defense system, retron, Anti-retron, defense canceler, tRNA.

24 The retron defense system composed of reverse transcriptase (RT), non-coding RNA, msrmsd,  
25 and accessory protein or RT-fused domain with various enzymatic functions<sup>1-3</sup>. The RT  
26 produces satellite msDNA molecules using msd RNA as the template<sup>4</sup>. Following the production  
27 of msDNA, the msd RNA template is digested by RNase H<sup>5</sup>. The final product is typically a  
28 branched DNA-RNA hybrid in which msd DNA and msr RNA are covalently joined via a 2'-5'  
29 phosphodiester bond<sup>4</sup>. In some cases, such as retron Ec78, Ec83 and Sen2, the msd DNA is  
30 further separated from the msr RNA<sup>6,7</sup> by the housekeeping exonuclease VII encoding genes  
31 *xseA* and *xseB*<sup>6,7</sup>. There are 13 different types of retrons based on their genetic structure and  
32 accessory proteins<sup>8</sup>. The accessory protein, which is hugely diverse across different retrons<sup>8</sup>, is  
33 the executor (effector protein) in retron defense that acts to abort phage infection through the  
34 inactivation of bacterial growth. In response to anti-phage defenses, phages have developed  
35 various counteract strategies, one of which is to encode proteins that inactivate defense,  
36 including these very recently identified anti-BREX<sup>9,10</sup>, anti-CBASS<sup>11,12</sup>, anti-Pycasr<sup>11</sup>, and anti-  
37 Thoeris<sup>13</sup>. The arms race between bacteria and phages is the natural driving force of the incessant  
38 emergence of sophisticated anti-phage defense systems whose discoveries and mechanistic  
39 understandings have brought about multiple impactful modern biotechnological tools.

40

#### 41 **Phage genes that inhibit retron function**

42 We have previously isolated and characterized a broad host range *Escherichia coli* phage  
43  $\Phi$ SP15<sup>14</sup> that shares high similarity with T5j phage, a wildtype T5 from phage collection of Jichi  
44 Medical University.  $\Phi$ SP15 was allowed to undergo spontaneous mutations through passage co-  
45 culture with bacteria under Fosfomycin addition. We identified one resultant mutant from each  
46 phage - T5n and  $\Phi$ SP15m, respectively, each carries an approximately 8kb-deletion region in

47 their genome, which is later found to encode multiple anti-defense systems, and we denoted  
48 Anti-Defense Island (ADI) (Fig 1A). The mutant T5n is a T5 strain obtained from Biological  
49 Research center, National Institute of Technology and Evolution (Tokyo, Japan) that may have  
50 undergone mutation during routine propagation. We evaluated the ability of these four phages to  
51 infect a bacterial library encompassing different types of antiphage defense system<sup>3</sup>. Both  
52 deletion mutants, T5n and  $\Phi$ SP15m, showed significant reduction in their infectivity against  
53 bacteria carrying Retron Ec67 and Retron Ec78 (Fig 1B and 1C, extended Fig 1). The ADI from  
54  $\Phi$ SP15 was then divided into nine fragments, each separately cloned into plasmid pKLC23<sup>15</sup>  
55 carrying pBAD inducible promoter and transformed into *E. coli* DH10B cells expressing Retron  
56 Ec67 or Retron Ec78, revealing that fragment 8 (F8 ADI) could rescue T5n and  $\Phi$ SP15m from  
57 both Retrons whereas fragment 6 (F6 ADI) only rescued phages from Retron Ec78 (Fig 1, D-F,  
58 extended Fig 3, A-B, extended Fig 4, A-B). Additionally, we found that F7 ADI and F8 ADI  
59 provided protection to phages from another retron that was not used during the first screening,  
60 Retron Ec83 (Fig 1F and 1I, extended Fig 5E). We discovered that ORF75 of  $\Phi$ SP15 which we  
61 named rad (retron anti-defense) was the genetic determinant in F8 ADI that enabled the phage to  
62 evade the three retrons. Meanwhile, the tRNA<sup>Tyr</sup> in F6 ADI was responsible for phage rescue  
63 from Ec78, and ORF71 and ORF72 of F7 ADI rescued phage from Ec83 (Fig 1, G-I, extended  
64 Fig 3c, Extended Fig 4, C-D and F-G, Extended Fig 5).

65

## 66 **Rad degrades retron ncRNA**

67 Rad is a small protein (189 amino acids) of unknown function, with primase/helicase and  
68 TOPIRM/RNase domain (Supplementary Table S1). A search based on homology identified 541  
69 Rad homologues in 19,263 phage genomes in the NCBI database. Rad-encoding phages belong

70 to two families; *Siphoviridae* and *Myoviridae* and infect at least nine different genera of bacteria  
71 from three taxonomic phyla; *Proteobacteria*, *Cyanobacteria*, and *Actinobacteria* (Fig 2A,  
72 supplementary Table S2). We demonstrated that the Rad homolog from *Proteus mirabilis* phage  
73 (Rad<sup>Proteus phage Privateer</sup>) could strongly protect phages from Retron Ec78, while other Rad from  
74 *Shigella sonnei* phage (Rad<sup>Shigella sonnei phage</sup>) and Salmonella phage vB\_Sen\_I1 (Rad<sup>Salmonella phage</sup>  
75 vB\_Sen\_I1) showed moderate protection (Fig 2B and C, extended Fig 6A). Notably, Rad exhibited  
76 extensive inhibition against retrons including retron Ec48 and Se72 (Fig. 2D, Extended Fig 7)<sup>1</sup>.  
77 The anti-retron activity of Rad showed significant decrease by the introduction of single amino  
78 acid mutations at various locations that were conserved in other Rads (R13E, P33T, I88T,  
79 D135H, and E156H) (Fig 2, E-F, Extended fig 6B, Extended Fig 8, A-B). And when double  
80 mutations at selected conserved amino acids were introduced, Rad defense activity was  
81 completely abolished regardless of the location (Fig 2F, extended Fig 8C). Rad was shown to  
82 reduce msDNA and ncRNA (msr-msd transcriptional cassettes) of retron, but not the transcript  
83 of RT and effector protein, indicating that Rad may degrade the ncRNA to prevent further  
84 synthesis of retron (Fig 2, G-H). Exogenous expression of Rad via genome insertion improved  
85 T7 infectivity to bacteria carrying retron Ec67 (Fig 2I, Extended Fig 9).

86

### 87 **ptuAB of retron Ec78 degrades tRNA<sup>Tyr</sup>**

88 Since the inhibition of Retron by tRNA<sup>Tyr</sup> was specific to Ec78 (Fig. 1F), we firstly focused on  
89 the effector proteins, which show the highest variations in the retron gene cluster. Retron Ec78  
90 has two effector proteins, PtuA with an ATPase domain and an HNH endonuclease PtuB<sup>1,3</sup>. We  
91 then expressed the effector proteins individually (PtuA or PtuB) or together (PtuAB) under the  
92 inducible promoter pBAD. We demonstrated that PtuAB, but not the singly expressed effectors,

93 triggered bacterial growth arrest, indicating that PtuA and PtuB are the toxins of retron Ec78 (Fig  
94 3, A-B). When RT was removed from Retron Ec78, PtuAB toxicity was observed, but not when  
95 msrmsd was eliminated, indicating that the antitoxin activity against PtuAB requires RT alone  
96 (Fig 3B). This mode of action is different from the tripartite toxin-antitoxin observed in Retron  
97 Sen2. RNA hybridization assay showed that the bacterial tRNA<sup>Tyr</sup> was significantly depleted by  
98 PtuAB overexpression (Fig 3, C-D, extended Fig 10A). tRNA sequencing then confirmed that  
99 both bacterial tRNA<sup>Tyr</sup>, tRNA<sup>TyrU</sup> (tRNA-Tyr-GTA-2-2) and tRNA<sup>TyrV</sup> (tRNA-Tyr-GTA-1-1),  
100 were specifically down regulated in the bacteria where PtuAB expression was induced (Fig 3E,  
101 extended Fig 10, B-D). Taken together, these results reveal Retron Ec78 exerts its defense  
102 mechanism by aborting phage infection through depletion of bacterial tRNA<sup>Tyr</sup> via PtuAB.

103

#### 104 **Phage tRNA<sup>Tyr</sup> cancels abortive infection**

105 Because phage derived tRNA<sup>Tyr</sup> ( $\Phi$ tRNA-Tyr\_SP15) in F6 ADI can rescue phages from Retron  
106 Ec78 (Fig 1H), we speculated that  $\Phi$ tRNA-Tyr\_SP15 neutralizes Retron Ec78 through a  
107 different mechanism than Rad. Since changing the anticodon sequence of  $\Phi$ tRNA-Tyr\_SP15 or  
108 mutating the stem-loop sequence of  $\Phi$ tRNA-Tyr\_SP15 exterminated the neutralization effect of  
109  $\Phi$ tRNA-Tyr\_SP15 (Fig 4, A-E, Extended Fig 11A), we presumed that the function of  $\Phi$ tRNA-  
110 Tyr\_SP15 in protein synthesis would be essential for the inhibition of retron defense.

111 Complementation of the exogenous tRNA<sup>Tyr</sup> by either T5 tRNA<sup>Tyr</sup> ( $\Phi$ tRNA-Tyr\_T5), *Klebsiella*  
112 phage KpP\_HS106 tRNA<sup>Tyr</sup> ( $\Phi$ tRNA-Tyr\_KpP\_HS106), and endogenous host bacteria  
113 *Escherichia coli* DH10B tRNA<sup>Tyr</sup> (Ec\_tRNA-TyrU or Ec\_tRNA-TyrV) *in trans* under the SP15  
114 derived tRNA promoter ( $\Phi$ tRNA-Tyr promoter) successfully restored phage infection to that of  
115  $\Phi$ tRNA-Tyr\_SP15, instead only partial recovery was observed by complementation under *E. coli*

116 tRNA promoter (Ec\_tRNA-Tyr promoter) (Fig 4F, Extended Fig 11B). The ability of tRNA<sup>Tyr</sup> to  
117 rescue phage from retron defense was only observed on retron Ec78 (Fig 4, G-H, Extended Fig  
118 11C).

119

### 120 **Phage sensing mechanism of Retron Ec78 and Retron Ec67**

121 The retron defense system works by sensing phage infection and activating the effector  
122 protein(s). Various genetic determinants of phage that triggered antiphage defense systems have  
123 been studied elsewhere<sup>16</sup>, but only a small number of retron triggers have been identified. We  
124 sought to determine how the two retrons, Ec78 and Ec67, recognize and mitigate phage  
125 infection through screening for phage mutants that could bypass each of the retrons. T5n,  
126 ΦSP15m, and T2 were employed for Retron Ec67, while T5n and ΦSP15m were used against  
127 Retron Ec78 (Fig 5A).

128 For Retron Ec78, we found several missense mutations in the gene encoding for exonuclease  
129 D15 in all escaper mutants of T5n (seven) and ΦSP15m (four) (Fig 5B). D15 protein catalyzes  
130 both the 5'-exonucleolytic and structure-specific endonucleolytic hydrolysis of branched-DNA  
131 molecules<sup>22-24</sup>. Co-expression of D15 protein and Ec78 was not toxic to bacteria, but it restored  
132 Ec78 defense activity against escaper mutants of T5n and ΦSP15m (Fig 5C, extended Fig 12, A-  
133 B). Our findings suggest that Retron Ec78 defense may be triggered by not just D15 protein but  
134 also other unknown factor.

135 For Retron Ec67, we found a single point mutation that distinguishes the mutant phages from  
136 their parental strains in all seven T5 mutants, four ΦSP15m mutants, and three T2mutants (Fig  
137 5B). Since all escaper phages of T2 and T5n/ΦSP15m carry mutations in DenB and protein A1,  
138 respectively, we presumed that these genes are the genetic determinants that activate Ec67. Both

139 protein A1 and DenB are involved in DNA degradation; with protein A1 responsible for the  
140 degradation of host DNA as well as the shutoff of host genes<sup>17-19</sup>, whereas DenB protein cleaves  
141 single-stranded DNA in a dC-specific manner, which may be lethal to host dC-containing DNA  
142 replication<sup>20,21</sup>. Co-expression of DenB and Ec67 significantly inhibited bacterial growth (Fig  
143 5C). However, we could not observe the effect of protein A1 due to its toxicity<sup>16</sup>. Although T5n  
144 and  $\Phi$ SP15m do not carry DenB homolog protein, DenB complementation restored Ec67 defense  
145 activity against not only T2 escaper mutants but also those of T5n and  $\Phi$ SP15m (Fig 5C,  
146 extended Fig 12C). These findings imply that Rectron Ec67 defense may be triggered by the  
147 activity of *denB* gene rather than DenB protein itself.

148

## 149 **Discussion**

150 The current study describes Retron Ec78's defense mechanism and identifies the cellular target of  
151 its effector protein PtuAB. These two proteins are also found in Septu<sup>25,26</sup>, an antiphage defense  
152 system with unknown molecular mechanisms. ATPase-like domain has been found in another  
153 nuclease mediated anti-phage defense system Gabija<sup>25,26</sup>. The GbjA protein of Gabija system  
154 consists of ATPase-like domain and TOPRIM domain. The ATPase-like domain is strictly  
155 regulated by nucleotide concentration *in vitro*, meanwhile the GbjA is activated by the depletion  
156 of dNTPs during phage infections, which in turn activates the TOPRIM domain with its nuclease  
157 activity, causing bacterial death<sup>27</sup>. We hypothesized that PtuA employs a similar strategy, which  
158 may be activated by dNTP depletion during phage infection. This could also explain why D15  
159 protein, which is mutated in Ec78 escaper mutant phages, could not activate retron in the absence  
160 of phage infection. The expression of either PtuA or PtuB alone is not toxic to bacteria,  
161 suggesting these two proteins are most likely working together to induce bacterial growth arrest.

162 Retron Ec83 also has the same PtuAB effector as Retron Ec78, but failed to protect the phage by  
163 tRNA<sup>Tyr</sup> complementation, suggesting that it is likely targeting other tRNAs or nucleic acids.  
164 ADI region is moderately preserved in Tequintavirus (Extended Fig 1B). In SP15, it encodes Rad  
165 in the tRNA-rich region, and another retron blocker in F7 ADI that specifically inhibits Retron  
166 Ec83 (Fig 1F, extended Fig5). Moreover, the absence of ADI in T5n resulted in lower infectivity  
167 against the antiphage defense AVAST 2 (Fig. 1B, extended Fig 1A), indicating the existence of  
168 an anti-AVAST 2 in T5n's ADI and supporting the notion that anti-defense genes generally co-  
169 localize in a genomic island. Despite the genetic similarity of T-even phages, retron Ec67 used in  
170 the current investigation exhibited considerable inhibition on the T2 phage but only moderate  
171 inhibition on other T-even phages such as T4 and T6. We hypothesized that T4 and T6 might  
172 have other retron blockers, which allow them to evade Ec67. The lack of a Rad homolog protein  
173 in those phages, however, suggests that the T-even phage's retron blocker(s), if present, may be  
174 different from Rad.

175 First discovered in the 1950s, transfer tRNAs (tRNAs) have been found to play a vital role in the  
176 central dogma of molecular biology in all living systems<sup>28,29</sup>. Only one decade after its first  
177 discovery, bacteriophages are found to carry their own tRNAs<sup>30</sup>. tRNAs are found in  
178 bacteriophage genomes from various bacterial genera<sup>31</sup>, but their precise function has long been  
179 elusive. Several hypotheses have been proposed, the most well-known is codon compensation, in  
180 which codons rarely used by the host but required by the phage are supplemented by phage-  
181 encoded tRNAs. This hypothesis is supported by the observation that phage-derived tRNAs tend  
182 to correspond with codons that are highly used by phage-encoded genes<sup>32,33</sup>. Recent studies may  
183 have hinted at another function of phage-derived tRNAs where they were discovered to be used  
184 by phages to counteract the depletion of host tRNAs that occurs as a general response to phage



185 infection<sup>34,35</sup>. Our data showed that neither phage T5 nor SP15 endured any detrimental effects  
186 from losing a significant number of tRNAs in the ADI region. In contrast, these phages are no  
187 longer able to infect bacteria that are protected by the Retron Ec78 defense, suggesting that the  
188 phage tRNAs are involved in evading bacterial defense. So far, there has been multiple reports  
189 about nucleases, such as VapC<sup>36,37</sup>, PrrC<sup>38</sup>, or RelE<sup>39</sup>, of the toxin-antitoxin system, which are  
190 also known to target tRNA and are activated by various stress responses, including phage  
191 infection<sup>40</sup>. Most bacteria encode multiple defense systems, with an average of ~5 systems per  
192 genome<sup>41,42</sup>. This could be one of the reasons why T5-like phages, which carry multiple types of  
193 tRNAs in their genome, exhibits exceptionally broad host range<sup>14</sup>.

194

## 195 **Acknowledgments**

196 Funding: This work was supported by the Japan Agency for Medical Research and Development  
197 (grant No. JP21fk0108496 and JP21wm0325022 to KK, JP21gm1610002 to LC and KK), JSPS  
198 KAKENHI (Grant No. 21H02110 and 21K19666 to KK). The funders had no role in the study  
199 design, data collection and analysis, decision to publish, or preparation of the manuscript.

200

## 201 **Competing interests**

202 A.A.H., Y.T., K.W. and K.K. are co-inventors on a patent pending submitted by National  
203 Institute of Infectious Diseases, that based on the results reported in this paper.

204

205

206

## 207 Reference

- 208 1. Millman, A. *et al.* Bacterial Retrons Function In Anti-Phage Defense. *Cell* **183**, 1551-  
209 1561.e12 (2020).
- 210 2. Bobonis, J. *et al.* Bacterial retrons encode phage-defending tripartite toxin–antitoxin  
211 systems. *Nature* **609**, 144–150 (2022).
- 212 3. Gao, L. *et al.* Diverse enzymatic activities mediate antiviral immunity in prokaryotes.  
213 *Science (1979)* **369**, 1077–1084 (2020).
- 214 4. Yee, T., Furuichi, T., Inouye, S. & Inouye, M. Multicopy single-stranded DNA isolated from  
215 a gram-negative bacterium, *Myxococcus xanthus*. *Cell* **38**, 203–209 (1984).
- 216 5. Dhundale, A., Lampson, B., Furuichi, T., Inouye, M. & Inouye, S. Structure of msDNA from  
217 *myxococcus xanthus*: Evidence for a long, self-annealing RNA precursor for the covalently  
218 linked, branched RNA. *Cell* **51**, 1105–1112 (1987).
- 219 6. Lima, T. M. O. & Lim, D. A Novel Retron That Produces RNA-less msDNA in *Escherichia*  
220 *coli* Using Reverse Transcriptase. *Plasmid* **38**, 25–33 (1997).
- 221 7. Jung, H., Liang, J., Jung, Y. & Lim, D. Characterization of cell death in *Escherichia coli*  
222 mediated by XseA, a large subunit of exonuclease VII. *Journal of Microbiology* **53**, 820–  
223 828 (2015).
- 224 8. Mestre, M. R., González-Delgado, A., Gutiérrez-Rus, L. I., Martínez-Abarca, F. & Toro, N.  
225 Systematic prediction of genes functionally associated with bacterial retrons and  
226 classification of the encoded tripartite systems. *Nucleic Acids Res* **48**, 12632–12647  
227 (2020).
- 228 9. Isaev, A. *et al.* Phage T7 DNA mimic protein Ocr is a potent inhibitor of BREX defence.  
229 *Nucleic Acids Res* **48**, 5397–5406 (2020).
- 230 10. LeGault, K. N. *et al.* Temporal shifts in antibiotic resistance elements govern phage-  
231 pathogen conflicts. *Science (1979)* **373**, (2021).
- 232 11. Hobbs, S. J. *et al.* Phage anti-CBASS and anti-Pycsar nucleases subvert bacterial immunity.  
233 *Nature* **605**, 522–526 (2022).
- 234 12. Huiting, E. *et al.* Bacteriophages inhibit and evade cGAS-like immune function in bacteria.  
235 *Cell* (2023) doi:10.1016/j.cell.2022.12.041.
- 236 13. Leavitt, A. *et al.* Viruses inhibit TIR gcADPR signalling to overcome bacterial defence.  
237 *Nature* **611**, 326–331 (2022).
- 238 14. Azam, A. H. *et al.* Selective bacteriophages reduce the emergence of resistant bacteria 1  
239 in the bacteriophage-antibiotic combination therapy 2 3. *BiorXiv* (2023)  
240 doi:10.1101/2023.01.22.525106.
- 241 15. Kiga, K. *et al.* Development of CRISPR-Cas13a-based antimicrobials capable of sequence-  
242 specific killing of target bacteria. *Nat Commun* **11**, 2934 (2020).
- 243 16. Stokar-Avihail, A. *et al.* Discovery of phage determinants that confer sensitivity to  
244 bacterial immune systems. *BiorXiv* (2022) doi:10.1101/2022.08.27.505566.
- 245 17. McCorquodale, D. J., Chen, C. W., Joseph, M. K. & Woychik, R. Modification of RNA  
246 polymerase from *Escherichia coli* by pre-early gene products of bacteriophage T5. *J Virol*  
247 **40**, 958–962 (1981).
- 248 18. Beckman, L. D., Hoffman, M. S. & McCorquodale, D. J. Pre-early proteins of  
249 bacteriophage T5: Structure and function. *J Mol Biol* **62**, 551–564 (1971).

- 250 19. McCorquodale, D. J. & Lanni, Y. T. Patterns of protein synthesis in Escherichia coli  
251 infected by amber mutants in the first-step-transfer DNA of T5. *J Mol Biol* **48**, 133–143  
252 (1970).
- 253 20. Ohshima, H., Hirano, N. & Takahashi, H. A hexanucleotide sequence (dC1 dC6 tract)  
254 restricts the dC-specific cleavage of single-stranded DNA by endonuclease IV of  
255 bacteriophage T4. *Nucleic Acids Res* **35**, 6681–6689 (2007).
- 256 21. Hirano, N., Ohshima, H. & Takahashi, H. Biochemical analysis of the substrate specificity  
257 and sequence preference of endonuclease IV from bacteriophage T4, a dC-specific  
258 endonuclease implicated in restriction of dC-substituted T4 DNA synthesis. *Nucleic Acids*  
259 *Res* **34**, 4743–4751 (2006).
- 260 22. Pickering, T. J., Garforth, S., Sayers, J. R. & Grasby, J. A. Variation in the Steady State  
261 Kinetic Parameters of Wild Type and Mutant T5 5′-3′-Exonuclease With pH. *Journal of*  
262 *Biological Chemistry* **274**, 17711–17717 (1999).
- 263 23. Garforth, S. J., Ceska, T. A., Suck, D. & Sayers, J. R. Mutagenesis of conserved lysine  
264 residues in bacteriophage T5 5′-3′ exonuclease suggests separate mechanisms of  
265 endoand exonucleolytic cleavage. *Proceedings of the National Academy of Sciences* **96**,  
266 38–43 (1999).
- 267 24. Feng, M. *et al.* Roles of divalent metal ions in flap endonuclease–substrate interactions.  
268 *Nat Struct Mol Biol* **11**, 450–456 (2004).
- 269 25. Payne, L. J. *et al.* Identification and classification of antiviral defence systems in bacteria  
270 and archaea with PADLOC reveals new system types. *Nucleic Acids Res* **49**, 10868–10878  
271 (2021).
- 272 26. Doron, S. *et al.* Systematic discovery of antiphage defense systems in the microbial  
273 pangenome. *Science (1979)* **359**, (2018).
- 274 27. Cheng, R. *et al.* A nucleotide-sensing endonuclease from the Gabija bacterial defense  
275 system. *Nucleic Acids Res* **49**, 5216–5229 (2021).
- 276 28. Kresge, N., Simoni, R. D. & Hill, R. L. The Discovery of tRNA by Paul C. Zamecnik. *Journal*  
277 *of Biological Chemistry* **280**, e37–e39 (2005).
- 278 29. CRICK, F. Central Dogma of Molecular Biology. *Nature* **227**, 561–563 (1970).
- 279 30. Weiss, S. B., Hsu, W. T., Foft, J. W. & Scherberg, N. H. Transfer RNA coded by the T4  
280 bacteriophage genome. *Proceedings of the National Academy of Sciences* **61**, 114–121  
281 (1968).
- 282 31. Bailly-Bechet, M., Vergassola, M. & Rocha, E. Causes for the intriguing presence of tRNAs  
283 in phages. *Genome Res* **17**, 1486–1495 (2007).
- 284 32. Bailly-Bechet, M., Vergassola, M. & Rocha, E. Causes for the intriguing presence of tRNAs  
285 in phages. *Genome Res* **17**, 1486–1495 (2007).
- 286 33. Wilson, J. H. Function of the bacteriophage T4 transfer RNA's. *J Mol Biol* **74**, 753–757  
287 (1973).
- 288 34. Yang, J. Y. *et al.* Degradation of host translational machinery drives tRNA acquisition in  
289 viruses. *Cell Syst* **12**, 771-779.e5 (2021).
- 290 35. Thompson, D. M. & Parker, R. Stressing Out over tRNA Cleavage. *Cell* **138**, 215–219  
291 (2009).
- 292 36. Winther, K., Tree, J. J., Tollervey, D. & Gerdes, K. VapCs of Mycobacterium tuberculosis  
293 cleave RNAs essential for translation. *Nucleic Acids Res* **44**, 9860–9871 (2016).

- 294 37. Cruz, J. W. *et al.* Growth-regulating Mycobacterium tuberculosis VapC-mt4 toxin is an  
295 isoacceptor-specific tRNase. *Nat Commun* **6**, 7480 (2015).
- 296 38. Levitz, R. *et al.* The optional E. coli prr locus encodes a latent form of phage T4-induced  
297 anticodon nuclease. *EMBO J* **9**, 1383–1389 (1990).
- 298 39. Pedersen, K. *et al.* The Bacterial Toxin RelE Displays Codon-Specific Cleavage of mRNAs in  
299 the Ribosomal A Site. *Cell* **112**, 131–140 (2003).
- 300 40. Calcuttawala, F. *et al.* Apoptosis like symptoms associated with abortive infection of  
301 Mycobacterium smegmatis by mycobacteriophage D29. *PLoS One* **17**, e0259480 (2022).
- 302 41. Tesson, F. *et al.* Systematic and quantitative view of the antiviral arsenal of prokaryotes.  
303 *Nat Commun* **13**, 2561 (2022).
- 304 42. Millman, A. *et al.* An expanded arsenal of immune systems that protect bacteria from  
305 phages. *Cell Host Microbe* **30**, 1556-1569.e5 (2022).

306

307

308 **Figure legend**

309

310 **Figure 1.**

311 Identification of phage genes involved in retron evasion. (a) Genomic comparison of T5 and T5-  
312 like phage SP15. A genomic region of approximately 8 kb hereafter denotes as Anti-Defense  
313 Island\_(ADI) in T5j and SP15 were missing in T5n and SP15m, respectively. The visualized  
314 genomic comparison was generated using Easyfig<sup>1</sup>. (b) Simplified depiction of phage spot assay  
315 to evaluate the phage infectivity against bacteria with different antiphage defense systems. Phage  
316 solutions from serial 10-fold dilutions were dropped on bacteria lawn and the efficiency of  
317 plating (EOP) was measure accordingly. (c) Heatmap depicting the EOP change based on spot  
318 assay of phages on bacteria carrying plasmid with different defense systems. The bacterial strain  
319 used in this assay was *Escherichia coli* DH10B, the plasmids with antiphage defense systems are  
320 provided by Feng Zhang<sup>2</sup> and are available on Addgene. T5n and SP15m showed decreased EOP  
321 comparing to their respective wild-type T5j and SP15 on bacteria with retron Ec67 and Ec78  
322 defense systems. T5n has decreased EOP comparing to T5j on bacteria carrying AVAST 2. (d)  
323 Fragmentation of ADI into nine fragments. The ADI fragments were separately cloned into  
324 plasmid under a pBAD inducible promoter and co-transformed with retron into *E. coli* DH10B.  
325 (e) Genetic organization of fragment 6 (F6 ADI), fragment 7 (F7 ADI), and fragment 8 (F8 ADI).  
326 (f) Heatmap based on spot assay of phages on bacteria carrying retron and different ADI  
327 fragments. F8 ADI neutralized defense activity of three different retrons Ec67, Ec78, and Ec83,  
328 tested in this panel. F6 and F7 ADI specifically neutralized Ec78 and Ec83, respectively. (g, h, i)  
329 Heatmap based on spot assay of phages on bacteria carrying retron and different F6, F7, and F8  
330 ADI fragments. ORF75 in the F8 ADI neutralized all retrons tested, hereafter we name it Retron-  
331 anti defense (Rad). (h) In F6 ADI, tRNA<sup>Tyr</sup> was found to be the genetic determinant responsible  
332 for Ec78 neutralization. The neutralization of F6 ADI was defective when tRNA<sup>Tyr</sup> was deleted,  
333 and co-expression of tRNA<sup>Tyr</sup> alone with Ec78 neutralized retron Ec78 defense activity. (i)  
334 Fragmentation of F7 ADI. Co-expression of two ORF72 and ORF73 are necessary to neutralize  
335 retron Ec83. Neither tRNA nor any single gene from F7 could neutralize Ec83. Empty vector  
336 pLG001 or pSC101 was used as negative control in all spot assay performed in this figure.  
337 Empty vectors indicate co-expression of empty vector and plasmid carrying retron.

338

339 **Figure 2.**

340 Rad is a potent blocker of retron defense that is widespread in phage infecting distinct genera. (a)  
341 Phylogenetic tree of Rad homologues from diverse bacteria genera. Bacteriophages that infect at  
342 least nine genera of bacteria carry Rad homolog, among these the Mycolicibacterium phages  
343 made up 40% of the Rad-carrying phages. (b) Simplified depiction of co-expression of Rad and  
344 retron. Rad was cloned into plasmid with pBAD inducible promoter. Spot assays were conducted  
345 using wildtype phage SP15 or T5j and their corresponding 8 kb deletion mutants, T5n or SP15m.  
346 (c) Rad from different phages that infected distinct taxa was capable of neutralizing retron. Rad  
347 from Salmonella phage vB\_Sen\_I1 and *Shigella sonnei* phage only slightly impair retron defense,  
348 whereas Rad from SP15, T5, and proteus phage Privateer all demonstrated substantial inhibitory  
349 action. (d) Rad blocks different retrons of distinct group. Rad effectively blocked retron Ec67,  
350 Ec78, and Ec83 and rescued SP15m. Utilizing phage  $\lambda$  vir, Rad rescued the phage from retron  
351 Ec48 and Se72. (e) Predicted structure of Rad using Alphafold. Amino acid mutations were  
352 introduced into conserved residues in Rad at different locations. (f) Single amino acid mutation  
353 in all selected locations slightly reduced activity of Rad to block retron. Rad activity was

354 completely hampered when each of the selected amino acid mutant was introduced together. (g)  
355 TBE-Urea PAGE of extracted msDNA from bacteria expressing retron. The msDNA product  
356 was significantly reduced when Rad was co-expressed with retron. Same result was observed in  
357 three different retrons Ec67, Ec78, and Ec83. (h) Real time quantitative PCR of retron cassette  
358 (msr-msd, RT, and effector protein) of Ec78. The relative expression of msr and msd RNA were  
359 significantly lower when Rad is co-expressed with retron. The experiment was conducted on  
360 three independent samples. Asterix indicates significant difference (\*\* $P < 0.01$ , \* $P < 0.05$ ,  
361 according to student t-test). (i) Exogenous expression of Rad in T7 phage. Chimera T7 carrying  
362 *rad* gene (T7rad) exhibited increased infectivity by tenfold against bacteria carrying retron Ec67.  
363

### 364 **Figure 3.**

365 tRNA<sup>Tyr</sup> is the cellular target of retron Ec78's effector proteins. (a) Simplified depiction of  
366 method to evaluate cellular target of PtuAB of Ec78. The effector protein of Ec78 (PtuAB) was  
367 cloned individually, PtuA or PtuB, or together, PtuAB, into plasmid under pBAD promoter.  
368 Glucose was used to block pBAD promoter while arabinose was used to induce the promoter.  
369 The induced cell was evaluated for their cytotoxicity (b), and the reduction in the expression of  
370 tRNA<sup>Tyr</sup> by dot blot RNA hybridization (c and d) and tRNA sequencing (e). (b) Induction of  
371 PtuAB promotes bacterial growth arrest. Induction of PtuA or PtuB alone was not toxic to  
372 bacteria, whereas induction of both (PtuAB) was toxic. (c and d) tRNA<sup>Tyr</sup> were significantly low  
373 in the bacteria where PtuAB was expressed. The intensity of the dot obtained from the RNA  
374 hybridization assay was visualized using ImageJ (d). (e) tRNA sequencing revealed the tRNA<sup>Tyr</sup>  
375 was significantly down regulated when PtuAB was induced.  
376

### 377 **Figure 4.**

378 tRNA<sup>Tyr</sup> from other phages or from host bacteria could rescue phage from retron Ec78. (a)  
379 Simplified depiction of the method to evaluate tRNA complementation on bacteria carrying  
380 retron Ec78. Complementation of tRNA was performed *in trans* by cloning the tRNA into  
381 plasmid under phage SP15 derived tRNA promoter ( $\Phi$ tRNA-Tyr promoter) located in F6 ADI.  
382 (b) RNAFold<sup>3</sup>-based structural prediction of tRNA<sup>Tyr</sup> SP15 ( $\Phi$ tRNA-Tyr\_SP15). To assess the  
383 impact of the mutation on the restoration of the phage from retron Ec78, sequence and structural  
384 mutations were introduced into tRNA. These mutations included the CCA terminus (CCA into  
385 AAA, yellow-green box), acceptor stem (UGG into AAA, orange box), D-stem (UGG into AAA,  
386 violet box), anti-stem (GUC into AAA, blue box), and T-stem (GGU into AAA, green box). (c)  
387 Phylogenetic tree of tRNA<sup>Tyr</sup> used in this study. (d) Sequence alignment of tRNA<sup>Tyr</sup> from T5  
388 ( $\Phi$ tRNA-Tyr\_T5), SP15 ( $\Phi$ tRNA-Tyr\_SP15), *Klebsiella* phage KpP\_HS106 ( $\Phi$ tRNA-  
389 Tyr\_KpP\_HS106), and *E. coli* tRNATyr (Ec-tRNA\_TyrU or Ec-tRNA\_TyrV). According to the  
390 predicted secondary structure, the loop, stem, and anticodon sequence of SP15 were highlighted  
391 in red letters within the colored boxes. (e) Heatmap based on spot assay of phage SP15 and  
392 SP15m on bacteria carrying retron Ec78 complemented with different mutant of  $\Phi$ tRNA-  
393 Tyr\_SP15. Regardless of the mutation locations, tRNA<sup>Tyr</sup> mutations eliminated the tRNA<sup>Tyr</sup>'s  
394 capacity to neutralize retron defense. (f) tRNA<sup>Tyr</sup> from different phages ( $\Phi$ tRNA-Tyr\_T5 and  
395  $\Phi$ tRNA-Tyr\_KpP\_HS106) or from *E. coli* rescue phage from retron Ec78. Notably,  
396 Ec\_tRNA\_Tyr could rescue the phage to the same extent as  $\Phi$ tRNA-Tyr\_SP15 when SP15  
397 tRNA promoter was utilized, however when *E. coli* tRNA promoter was used (Ec\_tRNA-Tyr  
398 promoter), the retron defensive activity was still visible. Other tRNAs ( $\Phi$ tRNA-Phe\_SP15 or  
399 Ec\_tRNA-His\_DH10B) and tRNATyr from human (Hs\_tRNA\_Tyr) or *Staphylococcus aureus*

400 (Sa\_tRNA\_Tyr\_USA300) did not rescue phage from retron Ec78. (g and h) tRNA<sup>Tyr</sup> specifically  
401 rescued phages from retron Ec78. Co-expression of tRNA<sup>Tyr</sup> with other retron was not able to  
402 rescue phage SP15m from retron Ec67, Ec78, nor Ec83 (g). Similarly, tRNA<sup>Tyr</sup> was not able to  
403 rescue phage  $\lambda$  vir from Ec48 nor Se72 (h).

404

405 Figure 5.

406 Evaluation of retron trigger. (a) Screening of retron escaping phages adapted from another study<sup>4</sup>  
407 with some modifications. Phage and bacteria harboring retron were cocultured in liquid medium  
408 overnight. Escaping mutant phages were screened from phage mixture obtained from the co-  
409 culture. Such mutant phages should form single plaque even when retron is presented in bacteria.  
410 The genomes of selected escaping mutants were analyzed and mapped to parental phage genome.  
411 Shared mutations in all escaping phages are expected to be the phage component that  
412 desensitized the phage to retron defense. (b) Mutations identified in escaping mutant phages. (c)  
413 Phage genes that are commonly mutated in escaping phages were tested for their toxicity when  
414 co-expressed with retron. D15 protein that was mutated in all Ec78 escaping phages was not  
415 toxic even when co-expressed with retron Ec78. DenB protein from Ec67 escaping T2 phage was  
416 highly toxic when co-expressed with Ec67, suggesting the importance of the gene in the  
417 activation of Ec67. (d) Complementation of D15 restored retron defense against escaping phages,  
418 T5-8e and SP15m-8e, whereas complementation of the mutated version of D15 did not restore  
419 retron activity, indicating D15 may involve in retron Ec78 activation. (e) DenB complementation  
420 restored Ec67 defense against the escaping phages T5-6e, SP15m-6e, and T2-6e. Co-expression  
421 of DenB without ATc induction could restore retron defense against escaping phage T5-6e and  
422 SP15m-6e, but induction with 50ng/ml ATc (DenB 50) was needed to see the change in the  
423 escaping phage T2-6e. However, in such condition, retron Ec67 defense activity was not visible  
424 against escaping phage T5-6e and SP15m-6e, perhaps due the high toxicity of DenB. (f)  
425 Proposed mechanism of phage to escape retron Ec78. Phages encode three genetic factors related  
426 to retron defense; Retron-anti defense (Rad) that inhibited retron biosynthesis, retron trigger  
427 (D15 for Ec78, DenB or A1 for Ec67), and tRNAs to supplement the host tRNAs that was  
428 degraded by retron Ec78. Following infection of phage, retron may sense the phage protein that  
429 is either pre-made and packed together with phage genome in the capsid or the protein that is  
430 expressed during early production of phage particle. Production of such sensor/trigger may  
431 activate retron defense system either due to degradation of retron component (because most  
432 retron triggers identified in the current study are interestingly involved in nucleotide degradation)  
433 or retron senses degradation of host genomic DNA. Once the retron is activated, effector protein  
434 will be released from retron complex. We suggested that the depletion of dNTPs due to the  
435 overused of those for phage assembly may further trigger conformational change of PtuAB to its  
436 active form that cleaves bacterial tRNAs, resulting in bacterial growth arrest and aborts phage  
437 production. To evade retron defense, however, phage is equipped with Rad and/or, in case of  
438 Ec78, the phage encoded tRNAs as the counter-agents of PtuAB effector protein.

439

# Fig.1

a bioRxiv preprint doi: <https://doi.org/10.1101/2023.03.15.532788>; this version posted March 15, 2023. The copyright holder for this preprint (which was not certified by peer review) is the author/funder, who has granted bioRxiv a license to display the preprint in perpetuity. It is made available under a [CC-BY-NC-ND 4.0 International license](https://creativecommons.org/licenses/by-nc-nd/4.0/).

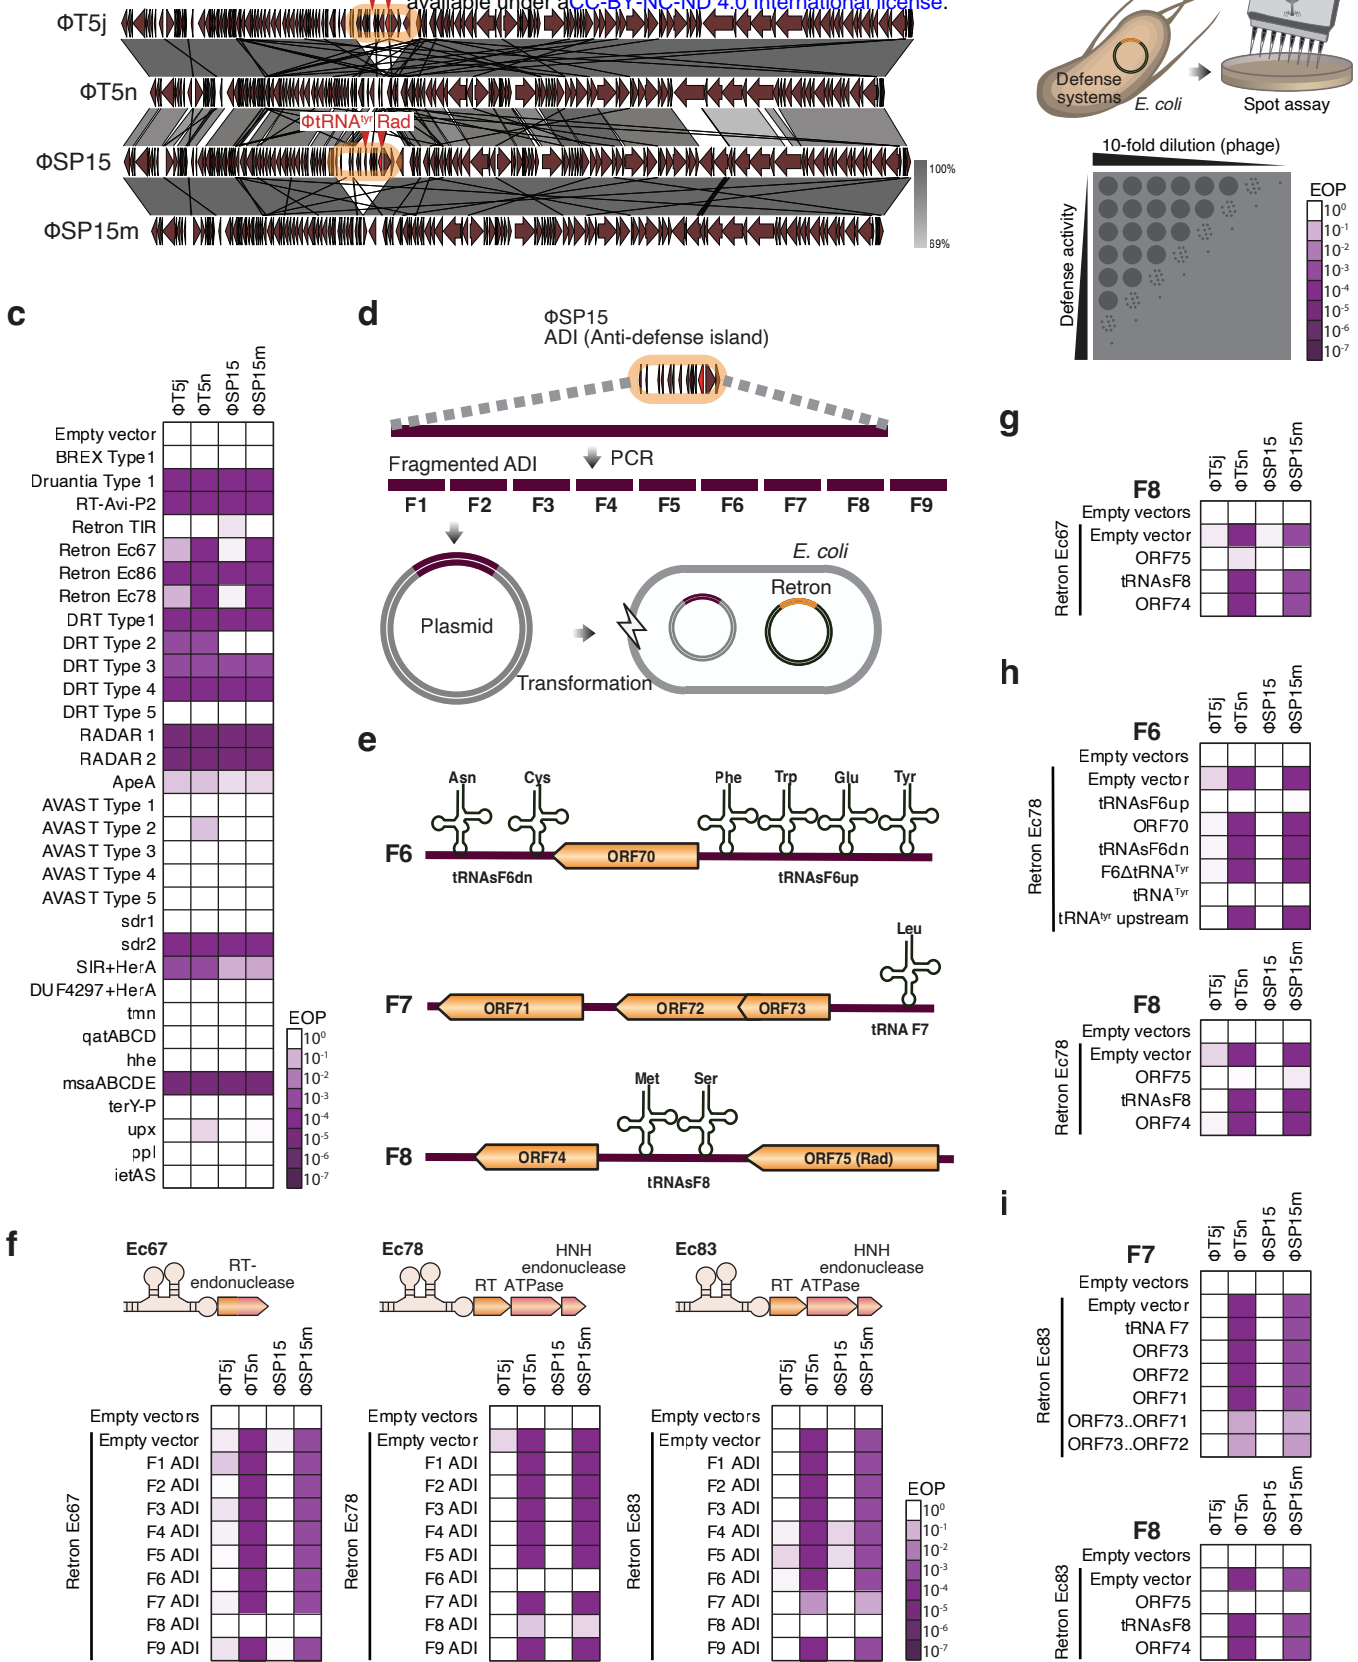



# Fig.2

bioRxiv preprint doi: <https://doi.org/10.1101/2023.03.15.532788>; this version posted March 15, 2023. The copyright holder for this preprint (which was not certified by peer review) is the author/funder, who has granted bioRxiv a license to display the preprint in perpetuity. It is made available under aCC-BY-NC-ND 4.0 International license.

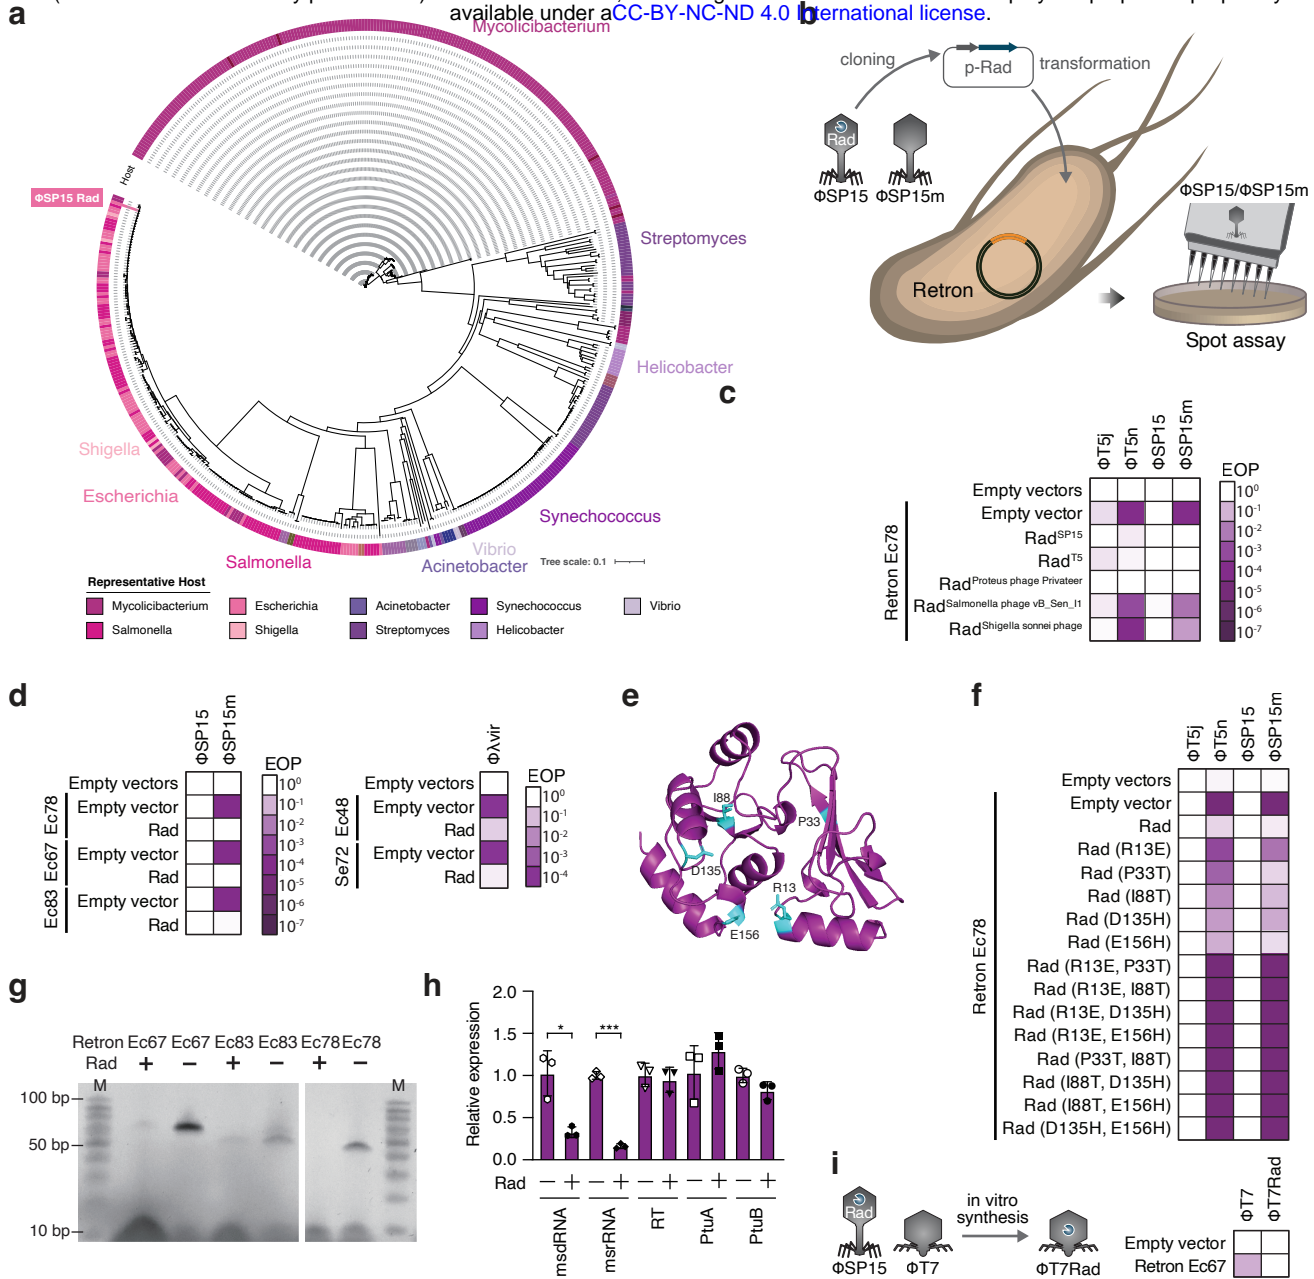

# Fig.3

bioRxiv preprint doi: <https://doi.org/10.1101/2023.03.15.532788>; this version posted March 15, 2023. The copyright holder for this preprint (which was not certified by peer review) is the author/funder, who has granted bioRxiv a license to display the preprint in perpetuity. It is made available under aCC-BY-NC-ND 4.0 International license.

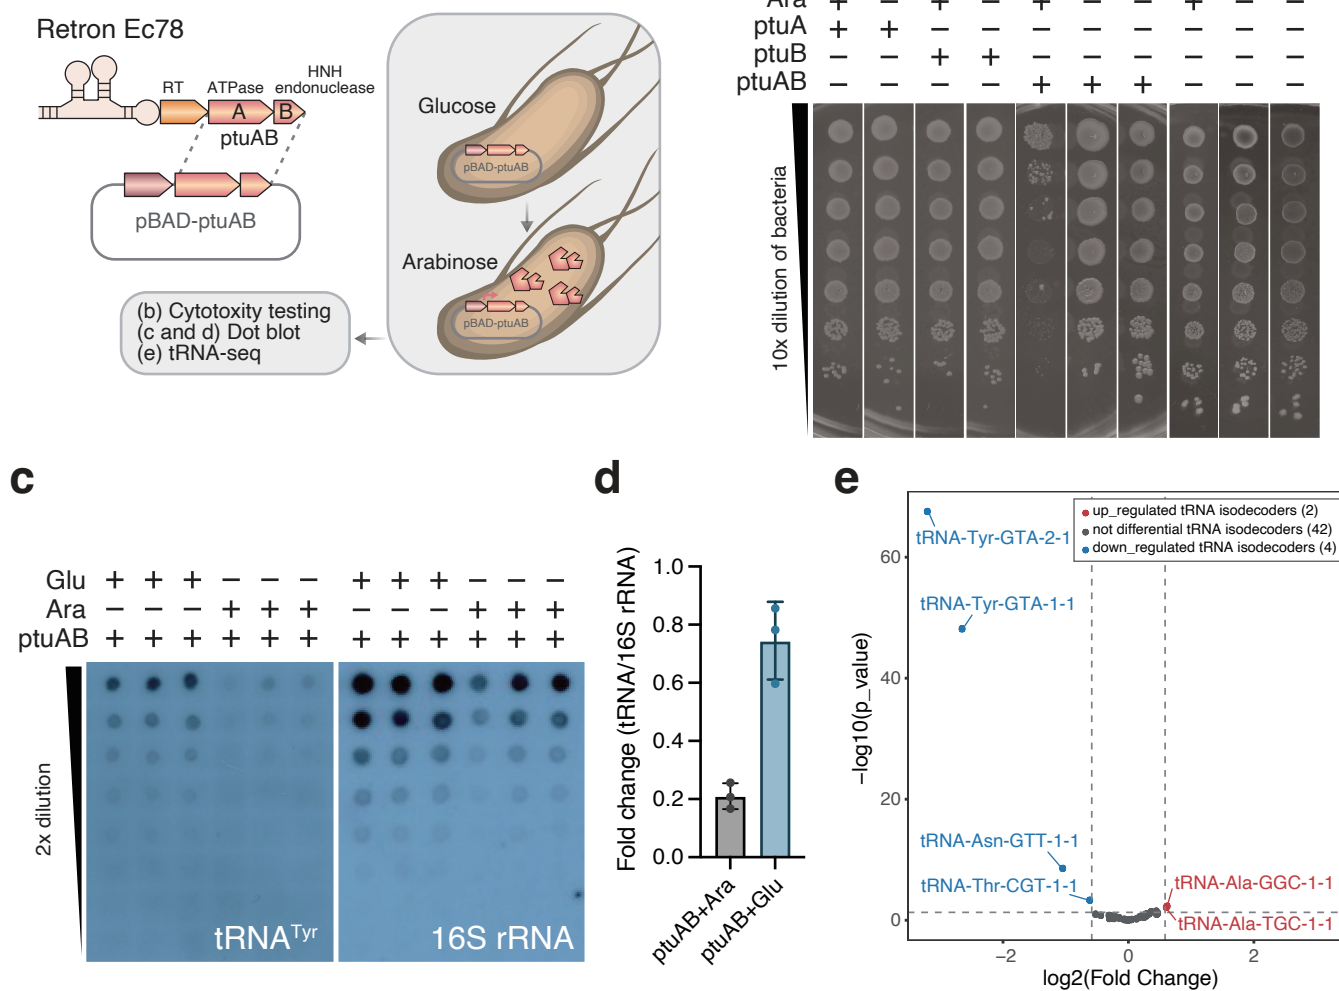

bioRxiv preprint doi: <https://doi.org/10.1101/2023.03.15.532788>; this version posted March 15, 2023. The copyright holder for this preprint (which was not certified by peer review) is the author/funder, who has granted bioRxiv a license to display the preprint in perpetuity. It is made available under aCC-BY-NC-ND 4.0 International license.

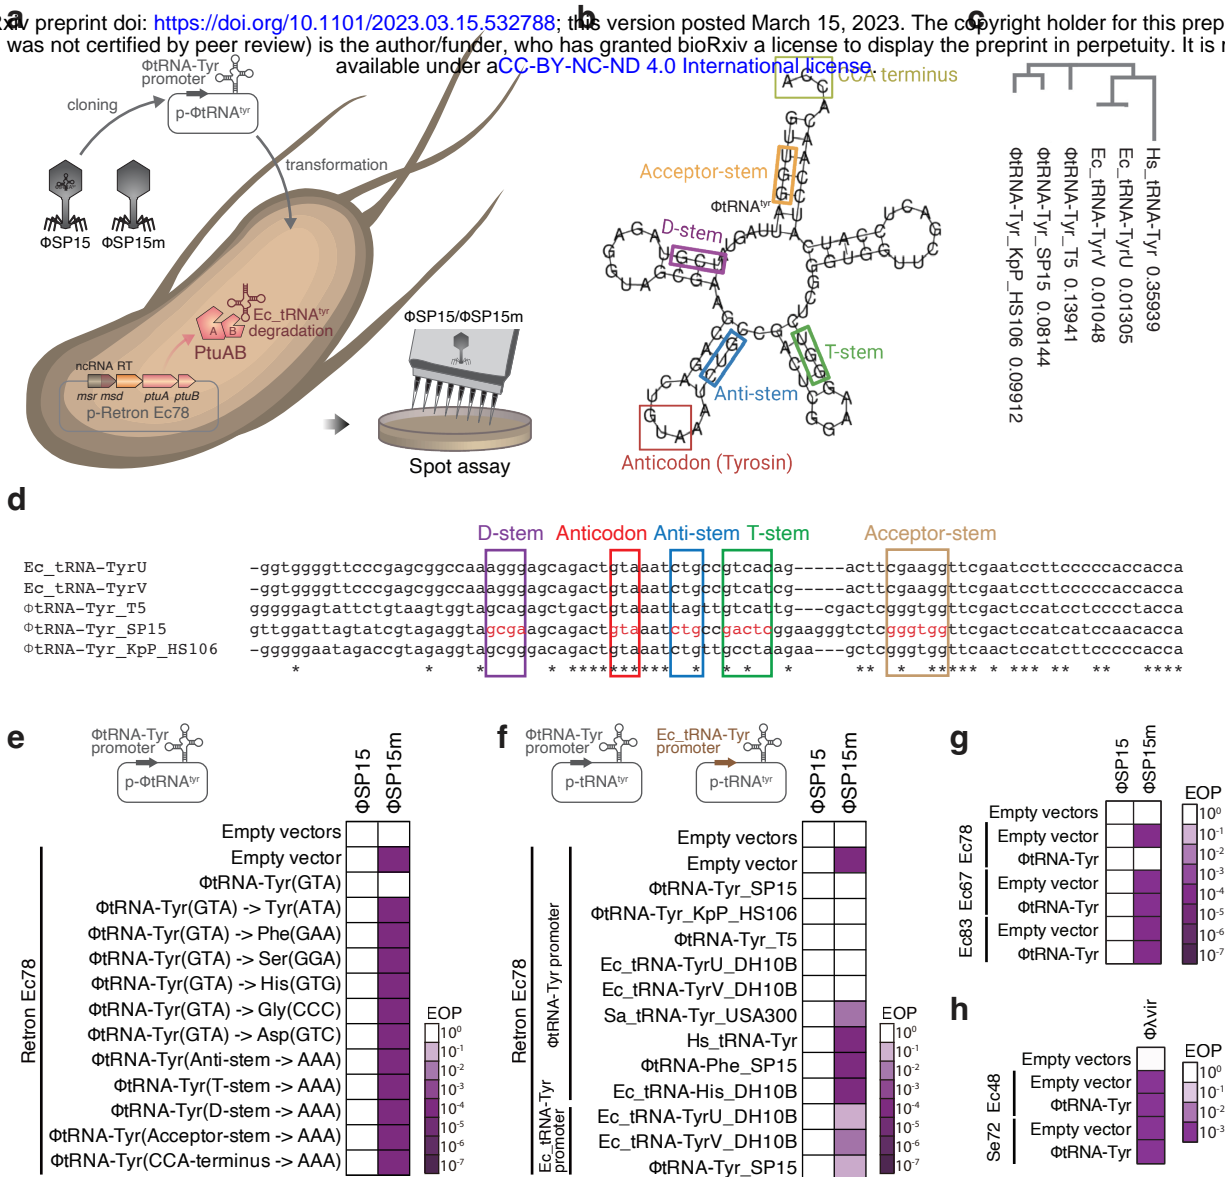

bioRxiv preprint doi: <https://doi.org/10.1101/2023.03.15.532788>; this version posted March 15, 2023. The copyright holder for this preprint (which was not certified by peer review) is the author/funder, who has granted bioRxiv a license to display the preprint in perpetuity. It is made available under aCC-BY-NC-ND 4.0 International license.

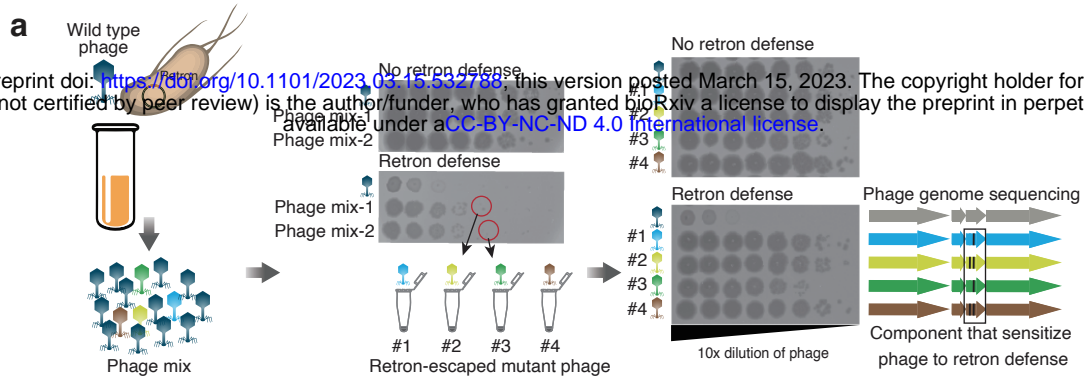

**b**

| Mutant phage | Sensitivity to Retron Ec78 | Sensitivity to Retron Ec67 | Mutated gene          |                |                       |                   |               |            |                 |            |
|--------------|----------------------------|----------------------------|-----------------------|----------------|-----------------------|-------------------|---------------|------------|-----------------|------------|
|              |                            |                            | Flap endonuclease D15 | DNA-binding D2 | HNH endonuclease HegF | Endonuclease DenB | ssDNA binding | Protein A1 | Long tail fiber |            |
| ΦT5_8e1      | Resistance                 |                            | Lys83Asn              |                | Ala101Asp             |                   |               |            |                 |            |
| ΦT5_e82      | Resistance                 |                            | Arg86His              | Ala78Pro       |                       |                   |               |            |                 |            |
| ΦSP15m_e81   | Resistance                 |                            | Arg86Leu              |                |                       |                   |               |            |                 |            |
| ΦSP15m_e82   | Resistance                 |                            | Arg86Gln, Gly154Ser   |                |                       |                   |               |            |                 |            |
| ΦT5_6e1      |                            | Resistance                 |                       |                |                       |                   |               |            | Frameshift      | Gly1057Ala |
| ΦT5_6e2      |                            | Resistance                 |                       |                |                       |                   |               |            | Frameshift      |            |
| ΦSP15m_6e1   |                            | Resistance                 |                       |                |                       |                   |               |            | Frameshift      |            |
| ΦSP15m_6e2   |                            | Resistance                 |                       |                |                       |                   |               |            | Frameshift      |            |
| ΦT2_6e1      |                            | Resistance                 |                       |                |                       |                   |               | Frameshift | Thr166Asn       |            |
| ΦT2_6e2      |                            | Resistance                 |                       |                |                       |                   |               | Frameshift |                 |            |

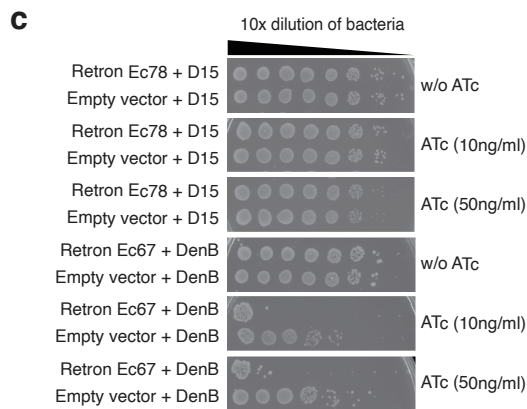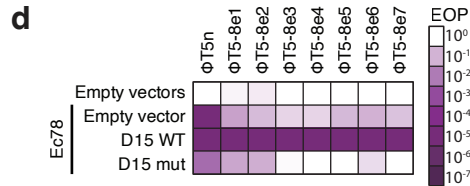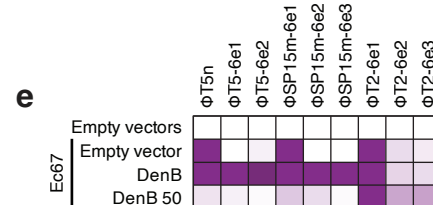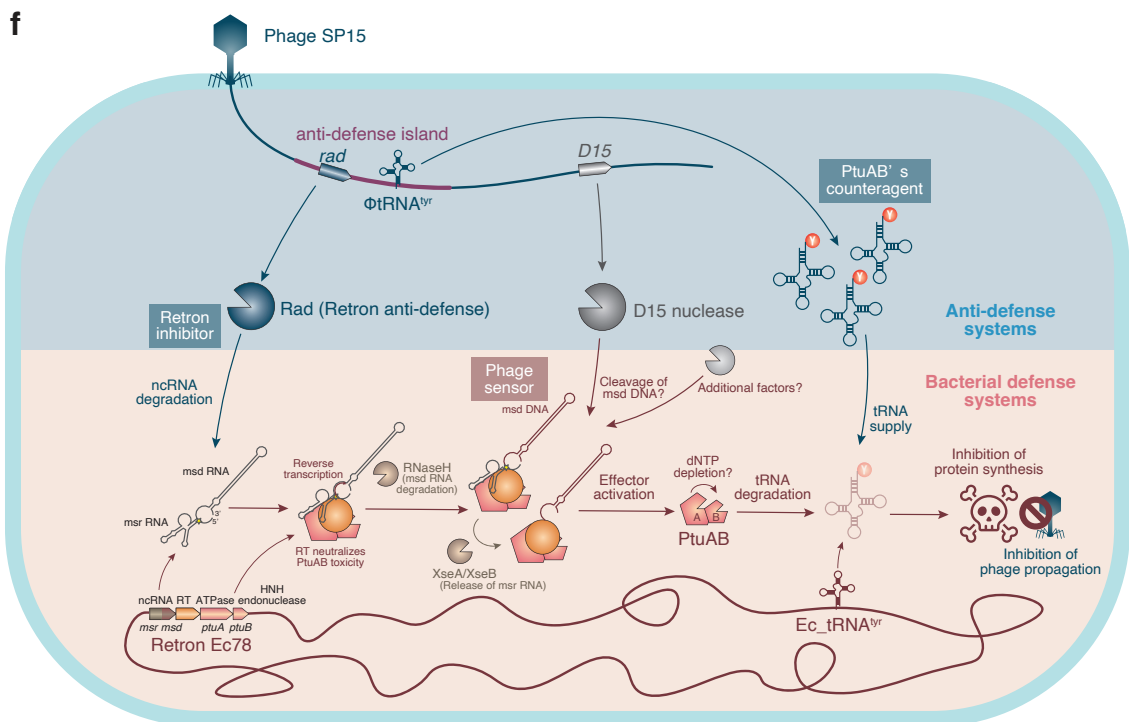

Source: https://www.biorxiv.org/content/biorxiv/early/2023/03/15/2023.03.15.532788.full.pdf
